# Supplementary material for: The Value of Animations in Biology Teaching: A Study of Long-Term Memory Retention
Source: Atypon-hosted journal article supplement (doi:10.1187/cbe.07-01-0002), 2007-09-01
Supplement: app1.pdf [file app1.pdf]

## Appendix 1. Instructions to Teaching Assistants

### BIO380 Animation Evaluation 2006

#### APOPTOSIS GRAPHIC—TUESDAY TUTORIAL

##### **Tutorial Information (for you to instruct class)**

- Make sure all students are settled and instruct them to stop talking; no talking during exercise
- Each person should be at their own computer
- Tell them to listen carefully because the instructions will not be repeated
- Tell them you will not be answering any questions
- Tell them not to take any notes from either the introduction or when viewing the graphic

##### **General Introduction to Class (read this exactly)**

The goal of today's exercise is to gain insight into the use of graphics as teaching tools. The work you do today will not affect your grade in the course and you will not be tested on this specific material as part of your grade in the course. The focus of today's tutorial is "Apoptosis". Apoptosis is described as "controlled cell death". As discussed in lecture, the topic of apoptosis is relevant to various aspects of the course such as oogenesis, the formation of limbs and other structures, so you will benefit from this exercise. You will also be contributing to the development of new ways to provide excellent teaching tools to students. Please follow the instructions carefully; not doing so could ruin the exercise.

##### **Introduction for the Class (read this exactly)**

- Today you will be viewing figures of apoptosis. Do not take any notes or discuss the figures during the viewing. After 10 minutes of viewing, I will ask you to exit the webpage and then I'll hand out a questionnaire for you to fill out. It is imperative that you do not talk or view the figures while filling out the questionnaire.
- Please note that other than labels for the molecules involved there is no audio or text to explain the figures so it is essential for you to visualize and interpret what you are viewing.
- Note that the graphics are presented in sequence with several events occurring within each panel.

##### **How to carry out the exercise (for you to instruct class)**

- After the introduction have students go to the course homepage and then type in "/pic.htm" after the homepage url, the whole url is:

**<http://www.utm.utoronto.ca/~w3bio380/pic.htm>**

- Tell them not to start viewing it until everyone has the web page with the animation on their screen; ask people to raise their hands to see if they're all ready
  - At that point tell them to start, after 10 minutes tell them to stop by going to another webpage; don't answer any questions during the viewing
  - Hand out the questionnaires and remind them to remain silent and answer all questions to the best of their ability
  - Tell them they can hand in their completed questionnaires and leave when they feel they have completed the exercise
  - Give them a maximum of 30 minutes to read and complete the questionnaire
  - DO NOT answer any questions about the animation or apoptosis—remind them you cannot answer any questions
- 
- 

### BIO380 Animation Evaluation 2006

#### APOPTOSIS ANIMATION—THURSDAY TUTORIAL

**Note:** if there was any deviation from the instructions in Tuesday's tutorial please include the same information here if possible; make note of what those changes were

**Tutorial Information (for you to instruct class)**

- Make sure all students are settled and instruct them to stop talking; no talking during exercise
- Each person should be at their own computer
- Tell them to listen carefully because the instructions will not be repeated
- Tell them you will not be answering any questions
- Tell them not to take any notes from either the introduction or when viewing the animation

**General Introduction to Class (read this exactly)**

The goal of today's exercise is to gain insight into the use of animations as teaching tools. The work you do today will not affect your grade in the course and you will not be tested on this specific material as part of your grade in the course. The focus of today's tutorial is "Apoptosis". Apoptosis is described as "controlled cell death". As discussed in lecture, the topic of apoptosis is relevant to various aspects of the course such as oogenesis, the formation of limbs and other structures, so you will benefit from this exercise. You will also be contributing to the development of new ways to provide excellent teaching tools to students. Please follow the instructions carefully; not doing so could ruin the exercise.

**Introduction to Animation for the Class (read this exactly)**

- Today you will be viewing a animation on apoptosis. Do not take any notes or discuss the animation during the viewing. After 10 minutes of viewing, I will ask you to exit the animation and then I'll hand out a questionnaire for you to fill out. It is imperative that you do not talk or view the animation while filling out the questionnaire.
- Please note that other than labels for the molecules involved there is no audio or text to explain the figures so it is essential for you to visualize and interpret what you are viewing.

**How to Carry out the Exercise (for you to instruct class)**

- After the introduction have students go to the course homepage and then type in "/ani.htm" after the homepage url, the whole url is:

**<http://www.utm.utoronto.ca/~w3bio380/ani.htm>**

- They'll have to click on the link to load the animation
- Tell them not to begin viewing it until everyone has the web page with the animations on their screen; ask people to raise their hands to see if they're all ready
- At that point tell them to start, after 10 minutes tell them to stop by going to another webpage; don't answer any questions during the viewing
- Hand out the questionnaires and remind them to remain silent and ask them to answer all questions to the best of their ability
- Give them a maximum of 30 minutes to read and complete the questionnaire
- DO NOT answer any questions about the animation or apoptosis—remind them you cannot answer any questions
