# Supplementary material for: The Value of Animations in Biology Teaching: A Study of Long-Term Memory Retention
Source: Atypon-hosted journal article supplement (doi:10.1187/cbe.07-01-0002), 2007-09-01
Supplement: app3.pdf [file app3.pdf]

## Appendix 3. Questions for Influenza Virus Evaluation

### Advanced Cell Biology (BIO315HF) Professor Danton H. O'Day Animation versus Graphics Evaluation: Influenza Infection

#### Part II. Specific Questions. Circle the correct answer...

1. The influenza virus is taken into cells via the process of
  - a. Pinocytosis
  - b. Protein-mediated uptake
  - c. Endocytosis
  - d. Cytokinesis
  - e. Viral kinesis
2. After viral uptake, the viral particle is in an intracellular vesicle that has
  - a. A neutral pH
  - b. An acidic pH
  - c. An alkaline pH
  - d. No significant pH
  - e. None of the above
3. The pH in the intracellular vesicle
  - a. Causes a shape change in HA
  - b. Causes a shape change in the vesicular membrane
  - c. Causes a shape change in NA
  - d. Causes it to exocytose HA
  - e. Both a and c are correct
4. The acronym HA stands for
  - a. Hemalysin
  - b. Hemagglutinin
  - c. Hemaglobin
  - d. Hemacyanin
  - e. None of the above
5. The acronym NA stands for
  - a. Neuraglutinin
  - b. Neural Adhesion
  - c. Neuraminidase
  - d. Neuraminic Acid
  - e. None of the above
6. On the influenza virus, NA and HA
  - a. Make up 80% of the viral surface
  - b. Are both RNA molecules
  - c. Are both proteins
  - d. Both a and b are correct

e. Both a and c are correct

7. The Influenza virus

- a. Contains 8 DNA gene segments encoding 8 proteins
- b. Contains 8 RNA gene segments encoding 8 proteins
- c. Contains 8 DNA gene segments encoding 10 proteins
- d. Contains 8 RNA gene segments encoding 10 proteins
- e. Both a and b are correct

8. A critical stage in viral entry is

- a. A conformational change in NA allowing release of the viral material from intracellular vesicles
- b. A conformational change in NA allowing binding of the viral material to intracellular vesicles
- c. A conformational change in HA allowing release of the viral material from intracellular vesicles
- d. A conformational change in HA allowing binding of the viral material to intracellular vesicles
- e. None of the above

9. Influenza viruses bind to the cell surface via

- a. Host cell HA-Viral protein interactions
- b. Viral HA-Host cell receptor interactions
- c. Viral NA-Host cell HA interactions
- d. Viral HA-Host cell HA interactions
- e. Viral NA-Host cell NA interactions

10. Influenza viruses enter human cells sequentially via

- a. Protein interactions at the cell surface, vesicle uptake and viral material release into the cytoplasm
- b. Viral binding to the cell surface, uptake into vesicles followed by viral material release into the cytoplasm
- c. HA binding to the cell surface, uptake into vesicles followed by viral material release into the cytoplasm
- d. Both a and b are correct
- e. All of the above are correct
